# Supplementary material for: Autocrine Action of IGF2 Regulates Adult β-Cell Mass and Function
Source: Oxford University Press journal article supplement (doi:10.2337/db14-1735), 2015-09-17

SUPPLEMENTARY DATA

**Supplementary Figure S1.** No alteration in body weight gain in  $\beta$ IGF2KO male and female mice were fed a NC or a HFD. Cohorts of male (A) and female (B) Ctrl and  $\beta$ IGF2KO mice fed a NC or a HFD from 6 weeks of age and body weight were determined at the indicated times. Data are means  $\pm$  SEM, n = 9–14.

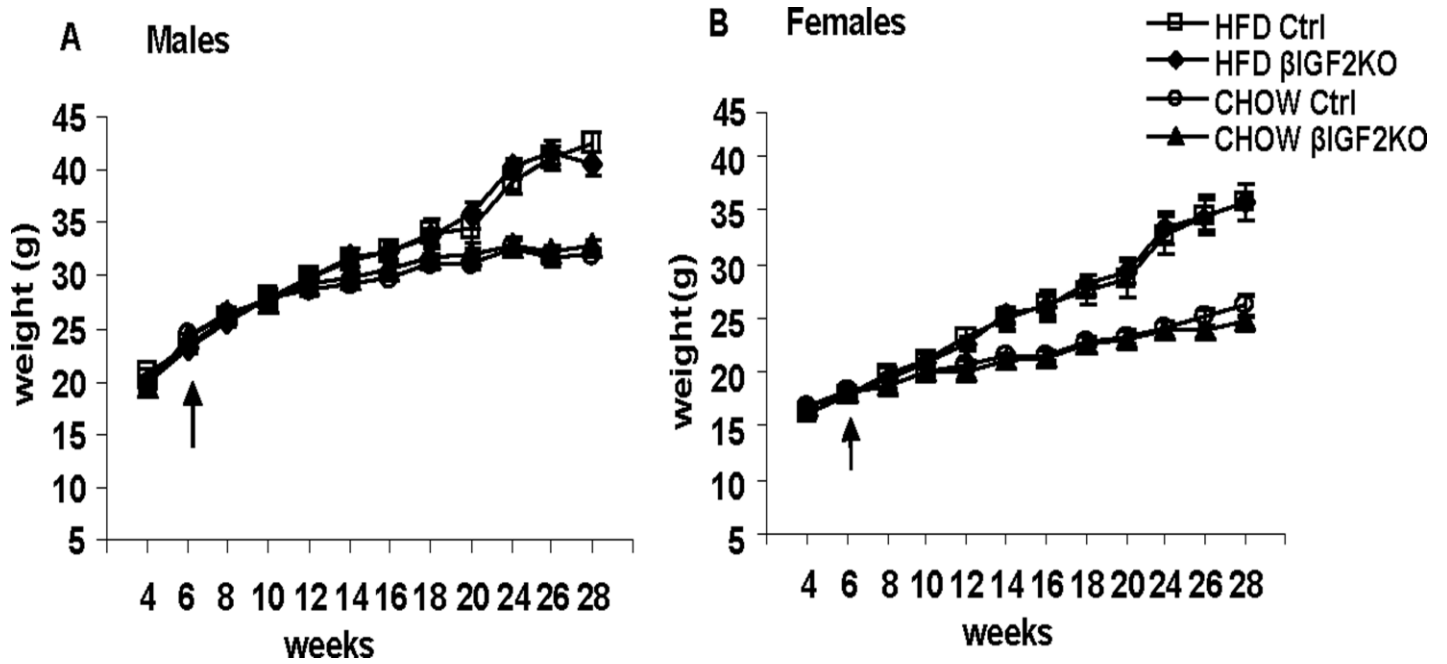

SUPPLEMENTARY DATA

**Supplementary Figure S2.** No impairment in glucose homeostasis in young and old  $\beta$ IGF2KO male mice. (A) Glucose tolerance, (B) insulin tolerance and (C) glucose-stimulated plasma insulin levels in 6-8 week-old male Ctrl and  $\beta$ IGF2KO mice measured at the indicated times after an i.p. glucose bolus. (D) Glucose tolerance, (E) insulin tolerance and (F) glucose-stimulated plasma insulin levels in 24-26 week-old male Ctrl and  $\beta$ IGF2KO mice. Data are means  $\pm$  SEM, n = 9-14.

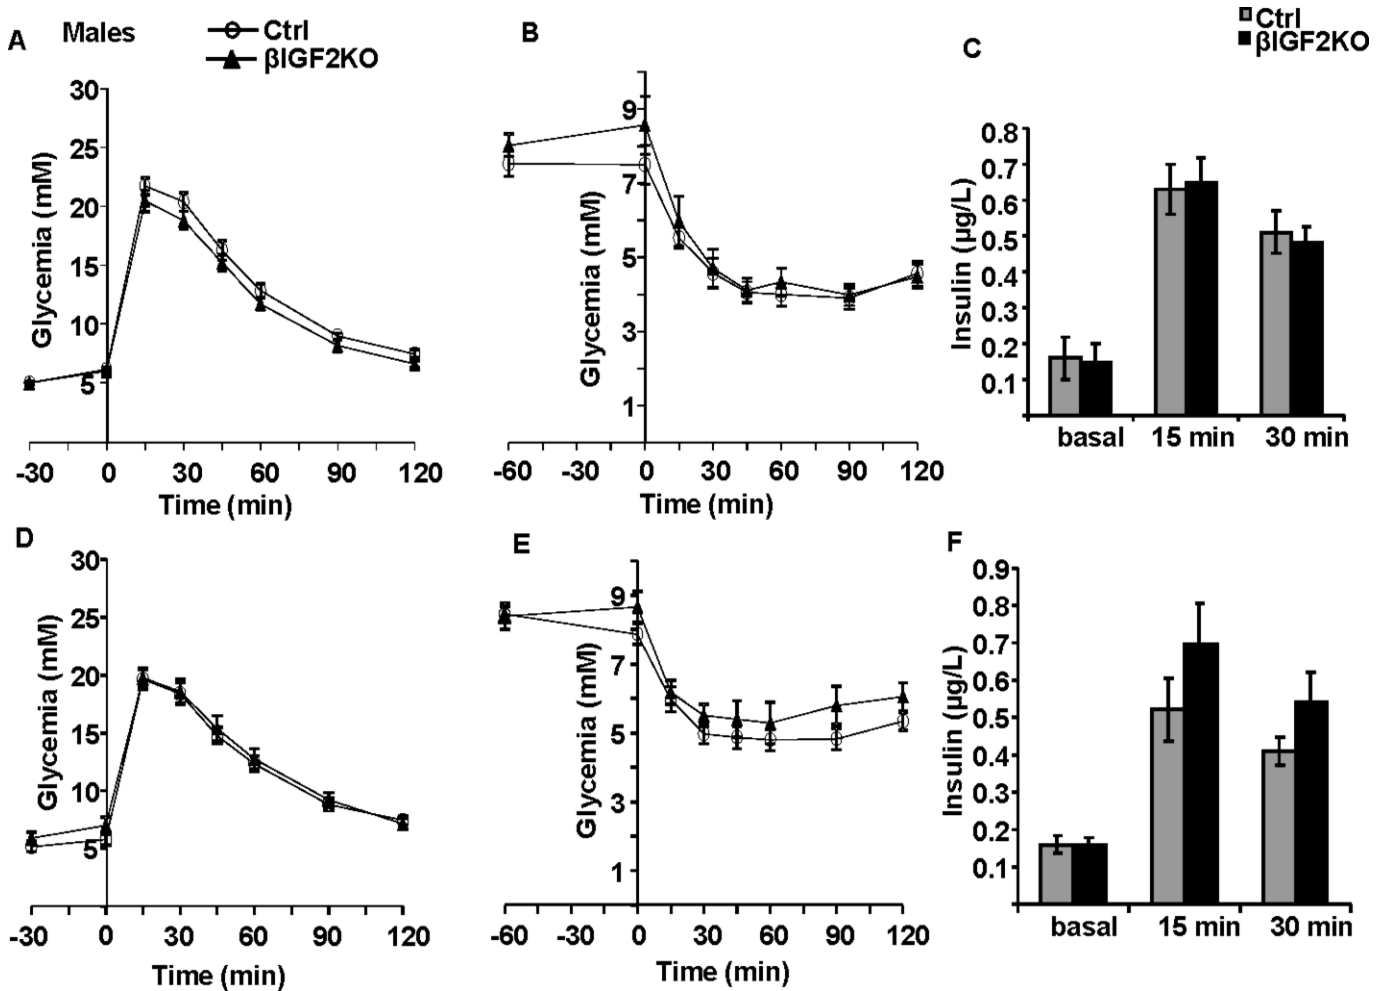

SUPPLEMENTARY DATA

**Supplementary Figure S3.** Insulin tolerance tests performed on high fat diet fed male (top row) and female (bottom row) Control and  $\beta$ IGF2KO mice. Five hour fasted mice were injected i.p. with 0.3 U/kg of insulin at time 0 and their blood glucose levels were measured at the indicated times. Left graphs: glycemic levels (mM); central graphs: glycemia expressed as percent of basal value; right graphs: area under the glycemic curves. \* $p < 0.05$ , \*\* $p < 0.01$ .

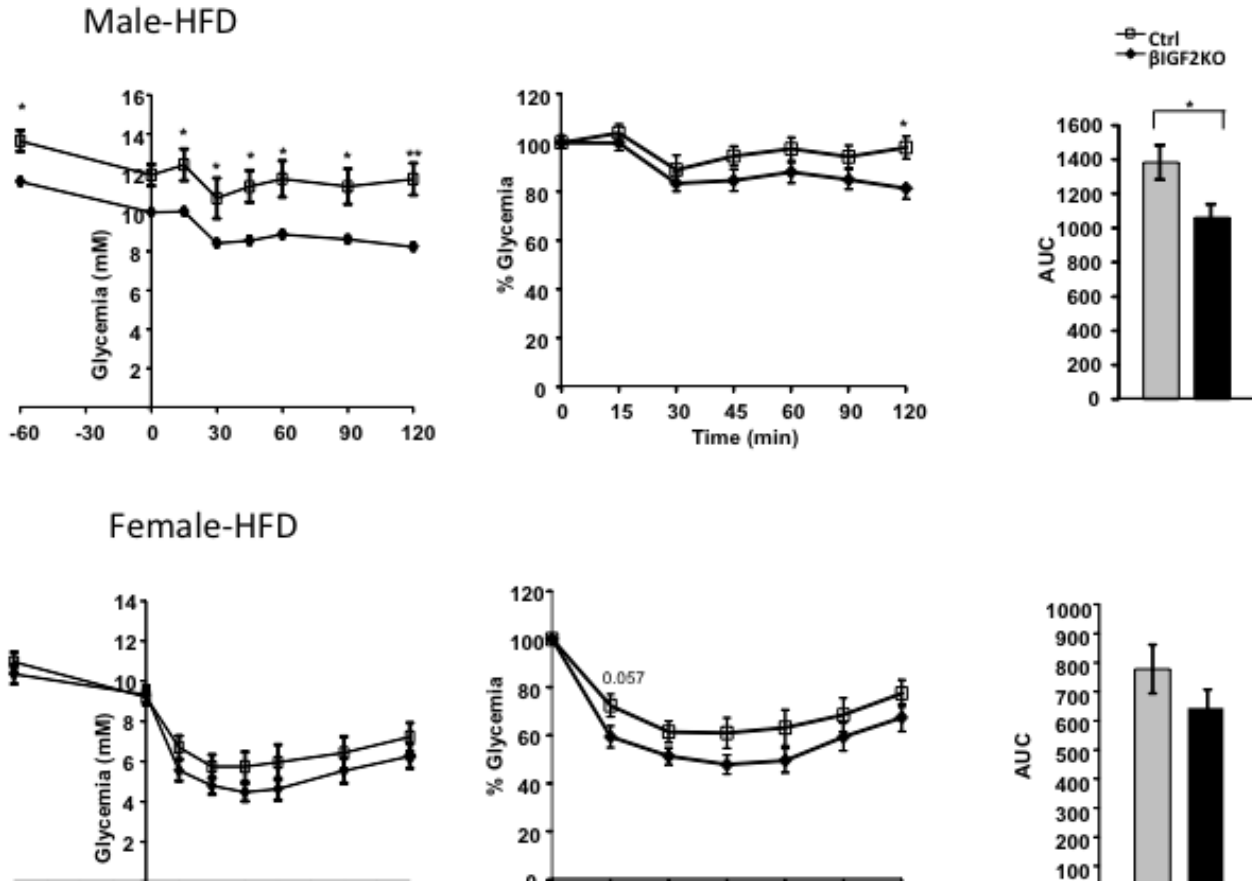

SUPPLEMENTARY DATA

**Supplementary Figure S4.** Normal glucose homeostasis in pregnant  $\beta$ IGF2KO mice. (A) Fed glycemia and (B) insulinemia of 14 day pregnant (P14) Ctrl and  $\beta$ IGF2KO mice. (C) Glucose tolerance test in virgin (P0) and 14 day pregnant (P14) Ctrl and  $\beta$ IGF2KO mice. Data are mean  $\pm$  SEM n=5-8.

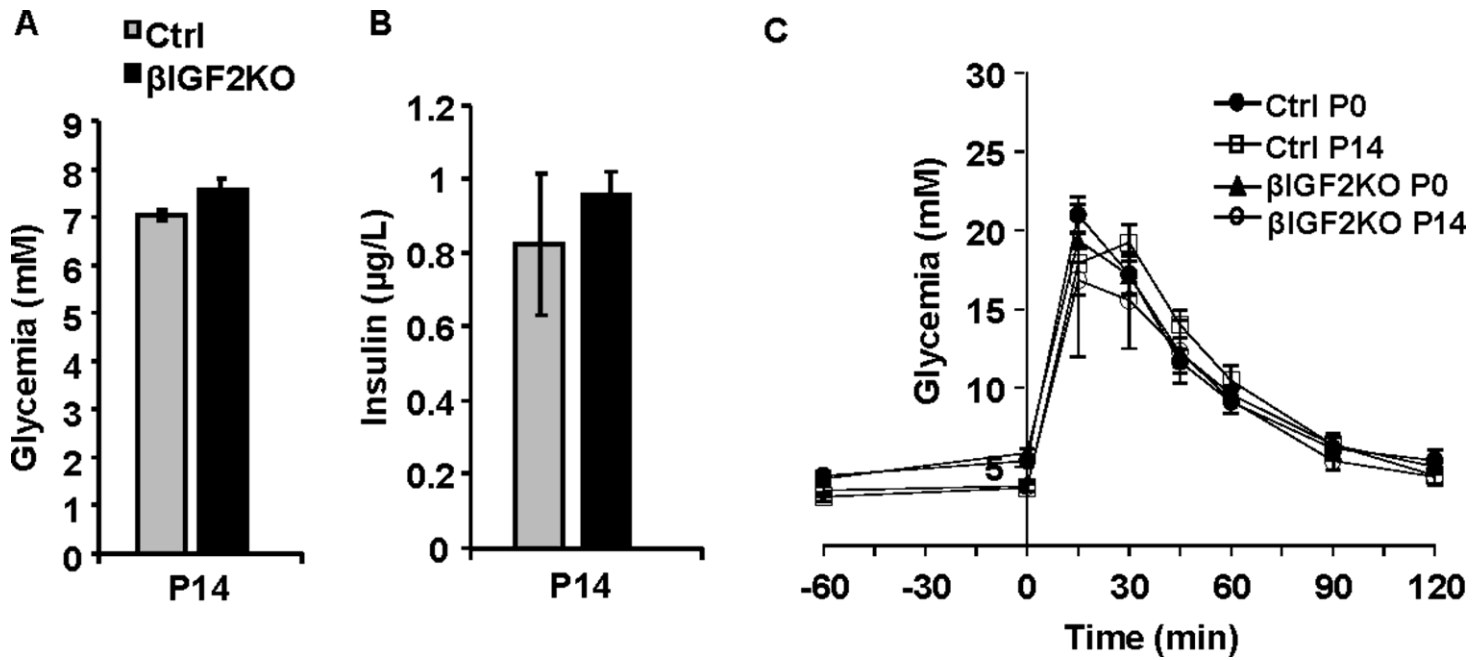

Supplement: db141735supplementarydata.pdf [file db141735supplementarydata.pdf]
